### A decrease in tricuspid regurgitation pressure gradient during follow-up in patients with heart failure

Y. Seko<sup>1</sup>, T. Kato<sup>1</sup>, E. Yamamoto<sup>1</sup>, H. Yaku<sup>1</sup>, T. Morimoto<sup>2</sup>, Y. Inuzuka<sup>3</sup>, Y. Tamaki<sup>4</sup>, N. Ozasa<sup>1</sup>, Y. Yoshikawa<sup>1</sup>, K. Nagao<sup>5</sup>, Y. Kawase<sup>6</sup>, K. Kuwahara<sup>7</sup>, T. Kimura<sup>1</sup>

<sup>1</sup>Kyoto University Graduate School of Medicine, Kyoto, Japan; <sup>2</sup>Hyogo Medical University, Nishinomiya, Japan; <sup>3</sup>Shiga general hospital, Moriyama, Japan; <sup>4</sup>Tenri hospital, Tenri, Japan; <sup>5</sup>Osaka Red Cross Hospital, Osaka, Japan; <sup>6</sup>Kurashiki Central Hospital, Kurashiki, Japan; <sup>7</sup>Shinshu University Hospital, Matsumoto, Japan

**Funding Acknowledgement:** Type of funding source: None

**Objective:** This study aimed to investigate the prognostic impact of the decrease in tricuspid regurgitation pressure gradient (TRPG) at 6-month follow-up in patients after discharge with heart failure (HF).

**Background:** No previous study has reported the association between TRPG decrease during follow-up and clinical outcomes in HF.

**Methods:** Among 748 patients with 6-months follow-up echocardiography after discharge from the acute decompensated heart failure in 19 centers in Japan, we analyzed 721 patients with available TRPG data and divided into two groups: the decrease in TRPG group (N=179) and no decrease in TRPG group (N=542). We defined the decrease in TRPG as >10mmHg decrease compared in the initial hospitalization. The primary outcome measure was a composite of all cause deaths and hospitalization due to HF.

**Results:** The patients in the decrease in TRPG group had a lower prevalence of hypertension, dyslipidemia, atrial fibrillation, and a reduced EF,

higher levels of blood albumin and lower levels of sodium than those in no decrease in TRPG group. The median follow-up duration after the follow up echocardiography was 302 (inter quartile range: 206–490), with a 90.9% follow up rate at 6-month. The cumulative 6-month incidence of the primary outcome measure was significantly lower in the decrease in TRPG group than in no decrease in TRPG group (12.2% vs. 18.9%, P=0.0011). After adjusting confounders, the excess risk of the decrease in TRPG relative to no decrease in TRPG for the primary outcome measure remained significant (HR: 0.60, 95% CI 0.34–0.99). There were no significant interactions between the subgroup factors and the effect of the decrease in TRPG for primary outcomes.

**Conclusions:** HF patients with the decrease in TRPG at 6-month after discharge had a lower risk of clinical outcome than those without decrease in TRPG.

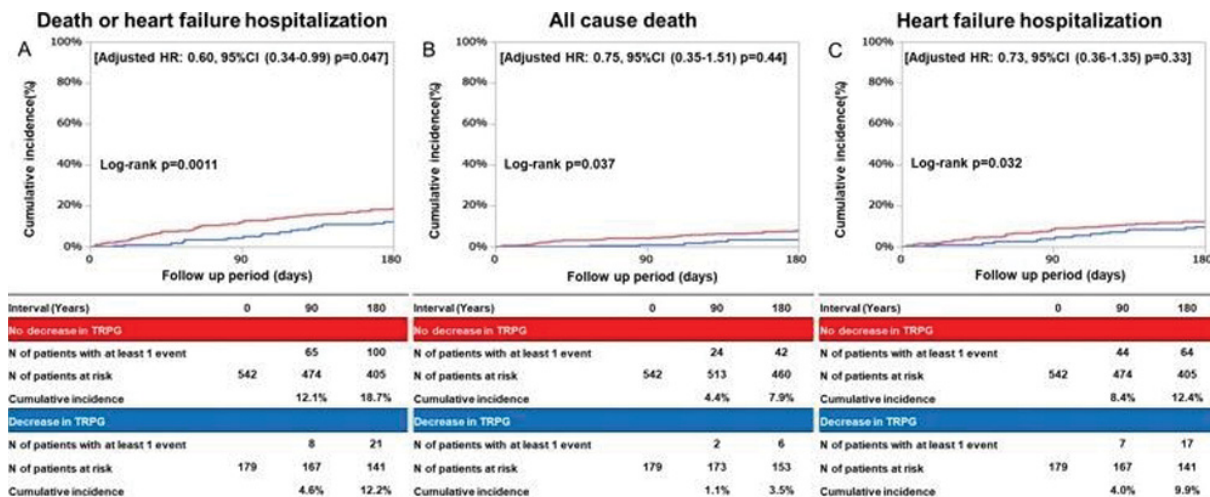

Downloaded from https://academic.oup.com/eurheartj/article/41/Supplement\_2/ehaa946.1015/6004635 by guest on 23 April 2024
